# Supplementary material
Source: publisher figshare collection journal article supplement (https://acs.figshare.com/ndownloader/files/5152729)

# Polyrotaxane Hexagonal Microfiber

Min Ji Hwang, Hyun Sook Bae, Sung Jin Kim\*, and Byeongmoon Jeong\*

*Department of Chemistry, Division of Nano Sciences, Ewha Womans University, Daehyun-Dong,*

*Seodaemun-Ku, Seoul, 120-750, Korea*

## Supporting information

Figure S-1. Scanning electron microscopic image of the inclusion complex of PEG and  $\alpha$ -CD recrystallized in deionized water. The scale bar is 1 micron.

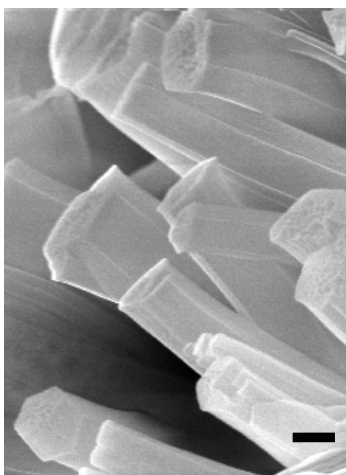

Figure S-2. The electron diffraction image of an inclusion complex of PEG and  $\alpha$ -CD.

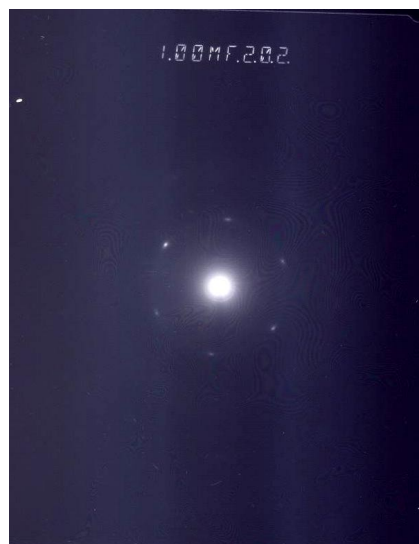

Figure S-3. FT-IR spectra of  $\alpha$ -CD, IC-1, and IC-2. Note the changes in the band at  $3000 \sim 3700 \text{ cm}^{-1}$  and shoulder formation at  $2883 \text{ cm}^{-1}$ .

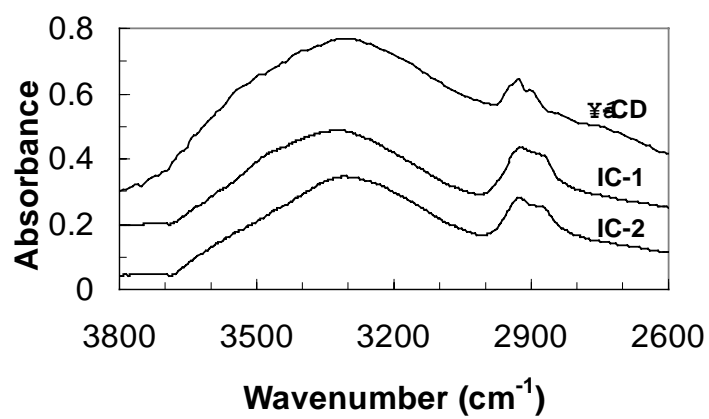

Supplement: Supplementary file 1 [file 5152729]
